# Supplementary material for: Preliminary data on pupal development, lifespan and fertility of Cynomya mortuorum (L., 1761) in Belgium (Diptera: Calliphoridae)
Source: Biodivers Data J. 2015 Jul 31;(3):e5387. doi: 10.3897/BDJ.3.e5387 (PMC4549644; doi:10.3897/BDJ.3.e5387)
Supplement: Supplementary material 1 — Raw Data for Fig.1a & 1b [file biodiversity_data_journal-3-e5387-s001.xls]

## Sheet: Sheet1
		Control	Test group
Pupa number	Sex	Day1	Day1	Day2	Day3	Day4	Day5	Day6	Day7	Day8
1	f	90.6	95.1	89.7	88.9	87.7	87	85.4	85.2	83.9
2	f	101.2	99.7	97.2	96.5	95.5	95	94.3	93.6	92.2
3	f	103.7	100.4	96.1	95.1	94	93.5	92.3	91.7	90.9
4	f	88.6	91.4	88.6	87.8	87	86.8	85.9	85.4	84.6
5	f	95.2	94.1	91.1	90.5	89.7	89.4	88.9	88.2	87.2
6	f	95.9	98.4	95.8	94.7	93.8	93.5	93	92.3	91.2
7	f	92.6	98.3	94.4	93.6	92.8	92.4	91.4	91	90.2
8	f	105	91.8	87.4	86.7	85.7	85.5	84.8	84.1	83.1
9	f	85.2	106.7	99.6	98.7	97.7	97.4	96.5	95.7	94.9
10	f	116.6	101.8	96.5	95.8	95.2	94.7	94.1	93.1	92.9
11	f	90	97	88.3	86.6	85.4	84.1	82.8	81.4	79.4
12	f	103.2	94.3	89.5	88.8	88	87.7	86.7	86.1	85
13	f	106.4	102.7	96.5	95.8	94.6	94.2	93.4	92.8	91.6
14	f	98	87.3	82.6	82	81.2	80.9	80	79.6	78.8
15	f	105.4	94.3	93	92.4	91.9	90.9	90.7	89.4
16	f	99.3	99.9	94.8	94.1	93.3	93	92.1	91.6	90.7
17	f	111.8	110.6	101.6	100.7	100	99.7	98.9	98.3	97.2
18	f	103.9	83.8	78.2	77.6	76.9	76.2	75.6	74.9	74.1
19	f	109.2	118.9	110.7	109.8	109	108.4	107.4	106.7	105.8
20	f	102.1	96.6	90.4	89.5	88.5	87.9	87.1	86.3	85.3
21	f	77	97.9	91.4	90.3	89.4	89	88.2	87.7	87.1
22	f	107.7	119.1	112.8	111.5	110.2	109.7	108.4	107.7	106.4
23	f	95.8	94.8	87.9	87.1	86.3	86.1	85.3	85.1	84.4
24	f	112.6	104.3	96.1	95.4	94.4	93.9	93.1	92.6	91.6
25	f	105.9	101.7	94	93.3	92.3	91.8	91.1	90.3	89.4
26	f	106	108.6	101.9	100.5	99.4	98.9	98	97.1	96.2
27	f	110.1	97.1	86.6	86.1	85.2	84.8	83.8	83.1	82.5
28	f	93	104.5	99.7	99.5	98.3	98.1	97.4	96.8	96
29	f	107.2	102.4	93.5	92.9	91.9	91.6	90.6	90	88.8
30	f	96.4	102	92.9	92.5	91.5	91.4	90.7	90	89.4
31	f	105	97.9	91.8	91.2	90.4	90.3	89.5	89.4	88.7
32	f	109.7	99	91.5	90.8	89.8	89.6	89	88.5	87.6
33	f	97.2	85	82.8	82	81.8	80.8	80.6	79.9	78.8
34	f	89.1	93.8	91.4	90.5	90.4	89.2	89	88	87.1
35	f	94.7	80.8	78.5	77.7	77.6	76.8	75.9	75.2	74.5
36	f	103.8	73.8	73	72.6	72.4	71.9	71.5	70.9	69.9
37	f	89	74.1	73.2	72.5	72.3	71.5	70.9	70.4	69
38	f	91.6	94.6	93.2	92.5	92.2	91.5	90.9	90.2	89.4
39	f	97.9	88.7	86	85.2	84.6	83.5	83.1	82.6	80.9
40	f	96.2	90.1	85.8	85.1	84.4	83.9	83.6	82.9	82
41	f	90.7	90.4	88.8	88.2	87.6	87.3	86.3	86	84.6
42	f	95.9	106	103.4	102.1	101.2	100.1	98.9	97.8	96.3
43	f	108.9	102.3	99.8	99.4	98.8	98.3	97.4	96.5	95.3
44	f	99.7	90.1	88.2	87.9	87.5	86.9	86.4	85.8	84.9
45	f	95.5	99.8	98.5	97.9	97.4	96.6	96.1	95.3	94.2
46	f	87.1	90.3	88.2	87.8	87.3	87	86	85.1	84.1
47	f	97.5	87.4	86.4	85.7	84.9	84.4	83.7	82.7	81.7
48	f	98.2	82	80.6	80.3	79.7	79.2	78.5	77.8	77
49	f	94.8	83.8	82.8	82.2	81.7	81.1	80.7	79.9	78.7
50	f	93.5	109.5	107.1	105.9	104.9	103.8	102.5	101.6	99.8
51	f	57.5	92.1	90.9	90.2	89.6	88.6	88.3	87.1	86.6
52	f	93.7	99.5	96.3	95.3	94.6	94	93.4	92.5	91.7
53	f	85.3	89.1	86	85.1	84.7	84.1	83.5	83.2	82.4
54	f	101.1	87.5	84.6	83.6	83.1	82.4	81.8	80.8	80
55	f	87.4	89.2	88.1	87.1	86.7	86.2	85.7	84.8	83.7
56	f	93.2	89.8	88.6	88	87.8	87.1	86.8	85.8	85.2
57	f	92.5	96.4	95	94.3	93.8	93.3	92.5	91.7	90.5
58	f	88.1	88.7	86.2	85.2	84.6	83.9	83.2	82.2	81.3
59	f	95.7	91.5	88.6	87.9	87.4	86.7	86	85.4	84.3
60	f	90.4	101.4	99.6	98.5	97.6	96.6	95.7	94.7	93.3
61	f	100.4	90.6	88.7	88	86.9	86.1	84.9	83.9	82.4
62	f	93.9	90.8	89.3	88.6	88	87.6	86.9	86.1	85.5
63	f	84.6	100.2	98.8	97.9	97.2	96.7	96	95.1	94.2
64	f	98.1	93.4	91.4	90.6	90.3	89.6	88.9	88.1	87.3
65	f	103.1	96.9	95.8	94.7	93.8	93.2	92.3	91.6	90.1
66	f	102.2	97.6	95.5	94.8	94.3	93.7	92.7	92	91.1
67	f	87.4	97.4	96.3	95.4	95	94.3	93.9	93	92.2
68	f	93.9	98.3	97	96.2	95.6	94.7	94.1	93.2	91.9
69	f	96.7	96.7	95.2	94.7	93.9	93.4	92.4	91.7	90
70	f	88.6	99	89.3	88.2	87.3	87.1	86.3	86.1	85.2
71	f	95.4	97.3	95	94	93.2	92.3	91.6	90.6	89.4
72	f	93.7	102.4	98.1	97.2	96.4	95.5	94.3	93.2	92.4
73	f	97	78.7	74.4	73.6	73.4	73	72.5	72	71.3
74	f	85.2	92.8	90	89.3	88.9	88.3	87.7	87.1	86.3
75	f	74.2	95.4	90.6	89.8	89.3	88.5	87.3	87.2	86.1
76	f	92.4	89.1	86.7	86.1	85.5	84.5	84	83	82.3
77	f	104	86	85.1	84.7	84.2	83.7	82.9	82.6	81.2
78	f	79	100.7	99.7	99.2	98.7	98.1	97.4	96.5	95.7
79	f	110.2	86.2	84.8	84.1	83.4	82.9	81.9	81.1	80.6
80	f	90.9	85.7	83.9	83.3	82.8	82.3	81.9	81.5	80.5
81	f	99.6	79.2	77.5	76.9	76.5	76	75.5	74.6	73.8
82	f	88.6	94.9	93.8	93	92.5	91.9	91.2	90.5	89.4
83	f	94.3	90.9	88.1	87.3	87	86.3	85.7	85	84.5
84	f	98.2	83.1	82.6	81.4	81.1	80.2	79.2	78.3
85	f	85.3	76.3	75	74.5	73.8	73.3	72.3	71.9	70.7
86	f	97.6	78.4	75.2	74.6	73.9	73.6	72.9	72.4	71.3
87	f	88.5	67.9	64.4	63.9	63.8	62.9	62.7	62.6	61.9
88	f	94.5	93.4	89.6	88.9	88.3	88	87	86.5	85.4
89	f	73.5	85.8	84.9	84.4	84	83.6	83.1	82.4	81.3
90	f	89.4	87.1	85.9	85.1	84.5	84.1	83.8	83.8	82.6
91	f	74.5	85	83.3	82.8	82.1	81.9	81.2	80.8	80
92	f	95.8	76.9	75.1	74.5	74.2	73.6	73.2	72.5	71.2
93	f	96.1	83.3	79.6	78.8	78	78.4	77.1	77	76
94	f	80.8	81.8	76.1	75.6	75	74.3	73.7	73.2	72.6
95	f	88.4
96	f	103.7
97	f	89.7
98	f	96
99	f	82.9
100	m	112.7	109.6	103.4	102	100.8	100.1	98.9	98	96.7
101	m	100.5	130.6	125.5	124.3	123	122.4	121	120.4	119.3
102	m	111.8	134.8	128.6	127	125.3	124.4	122.7	121.4	120
103	m	125	132	125.6	123.9	123.4	123.1	121.9	121.1	120.1
104	m	122.9	111.1	104.5	103.4	102.6	102	101.1	100.1	99
105	m	125	150.8	138	136.3	134.9	134.4	133	131.9	130.9
106	m	129	130.8	119.9	118.6	117.6	117.1	116.1	115.8	114.6
107	m	119.9	100.2	92.8	91.7	90.7	90.3	89.5	88.8	87.9
108	m	129.6	123.7	115.3	113.8	112.4	111.7	110.3	109.5	108.1
109	m	112.3	140.4	128.8	126.7	125	123.9	122.5	121.1	119.4
110	m	116.1	125	119.1	117.8	116.6	116	114.9	114.1	112.9
111	m	112.7	106.7	96.7	96.3	95	94.6	93.7	93.2	92.1
112	m	127.5	100.4	85.9	84.8	83.8	83.4	82.3	81.7	81
113	m	117.6	121.6	114.4	113.4	112.3	111.9	110.9	110.1	108.9
114	m	120.2	113.6	104.2	103.1	101.8	101.7	100.7	100.3	99.1
115	m	120.1	100.1	97.8	96.7	96.2	95.4	94.8	93.8	92.8
116	m	120	107.1	105.5	104.3	103.8	102.8	102.2	101.4	99.8
117	m	131.2	104.7	101.9	101.1	100.7	99.6	99.2	98.2	97.6
118	m	112.7	107.1	105.4	105	104.1	103.3	102.3	101.4	100.3
119	m	104.9	133.3	130.6	129.2	127.9	126.3	124.9	123.4	121.4
120	m	132.3	112.3	109.7	109.1	108.2	107.3	106.4	105.1	104
121	m	123.1	108.1	106.3	105.7	105.1	104.4	103.5	102.6	101
122	m	99.3	90.2	88.6	87.8	87.4	86.5	85.9	84.9	83.9
123	m	122.8	122.9	118.9	117.4	116.5	115.6	114.3	113	111.8
124	m	124	118	113	111.6	110.8	109.5	108.6	107.2	106
125	m	117.1	117.3	115.4	114.6	114	112.9	112.3	111.2	110
126	m	122.9	112.6	108.1	107.1	106.4	105.9	104.5	103.7	102.3
127	m	125.2	122.6	119.8	118.4	117.6	116.5	115.7	114.5	113.3
128	m	119	107.7	104.6	103.5	102.7	101.9	100.7	99.7	98.6
129	m	117	133	129.1	127.6	126.2	124.9	123.1	121.6	120.2
130	m	113.4	113.3	101.6	99.2	97.5	96.5	95.1	93.9	92.6
131	m	115	120.5	114.7	113.7	112.5	111.2	110.3	109.1	107.5
132	m	115.7	115.5	109.1	107.7	106.8	106	105	104.2	103.1
133	m	136.5	112.1	107.6	106.5	105.7	105.1	104.3	103.2	101.8
134	m	115.3	136.1	129.6	128.3	127.6	126.9	125.6	124.6	123.4
135	m	115.7	109.9	104.3	103.7	103	102.4	101.7	101	100
136	m	131.3	115	109.5	108.2	107.2	106.1	104.9	103.9	102.6
137	m	134.5	104.1	102.7	102.1	101.4	100.8	100	98.9	97.5
138	m	112	121.4	119.6	118.7	117.8	117	115.9	114.6	113.5
139	m	106.4	94.8	94.2	93.7	93.1	92.6	91.9	91.6	90.3
140	m	95.1	104.5	99.7	98.8	98	97.4	96.8	95.8	95
141	m	115.5	107.7	106	105.1	104.5	103.6	102.8	101.8	100.7
142	m	126.2	113.8	111.5	110.3	108.9	107.8	106.8	105.8	104.3
143	m	118.7	94.7	94.2	93.6	92.6	92.2	91.2	90.1
144	m	114.8	107.6	104.9	104.1	103.4	102.7	101.7	100.7	99.1
145	m	121.3	130.7	125.4	123.6	122.6	121.4	121	119.7	118.1
146	m	130.3	131.9	125.1	123.6	122.5	121.5	120	119.2	118.1
147	m	125.8	115.8	113.2	112.1	111.5	110.8	109.8	109	107.8
148	m	110.2	90.7	89.7	89.1	88.5	88	87.3	86.6	85.6
149	m	101.1	112.6	110.3	109.4	108.5	107.8	106.7	105.8	104.2
150	m	121.3	111.6	108.9	108	107.3	106.7	106	105.2	104
151	m	122.3	107.6	104.9	104.1	103.4	102.7	101.7	100.7	99.1
152	m	105.3	121.7	116	114.2	113.3	112.5	111.3	110.5	109.5
153	m	101.3	121.7	116	114.2	113.3	112.5	111.3	110.5	109.5
154	m	96.1
155	m	126.4
156	m	100.6
157	m	119.9
158	m	102.3
159	m	128.2
160	m	111.2
161	m	134.6
