# Supplementary material for: Preliminary data on pupal development, lifespan and fertility of Cynomya mortuorum (L., 1761) in Belgium (Diptera: Calliphoridae)
Source: Biodivers Data J. 2015 Jul 31;(3):e5387. doi: 10.3897/BDJ.3.e5387 (PMC4549644; doi:10.3897/BDJ.3.e5387)
Supplement: Supplementary material 2 — Raw Data for Fig 2 [file biodiversity_data_journal-3-e5387-s002.xls]

## Sheet: Sheet1
Raw data for the Fig2 - Number of eggs laid by each couple after their hatching
	Days after hatching
	day+5	day+6	day+7	day+8	day+9	day+10	day+11	day+12	day+13	day+14
couple01					78		26			35
couple02				33	32	15	37		146
couple03				39	87			18	52
couple04	152			34	1
couple05		121
couple06					36	26
couple07				114			78
couple08
couple09	129		22	98
couple10
	day+5	day+6	day+7	day+8	day+9	day+10	day+11	day+12	day+13	day+14
Number oviposition events	2	1	1	5	5	2	3	1	2	1
